# Supplementary material
Source: publisher figshare collection journal article supplement (https://adisjournals.figshare.com/ndownloader/files/40589831)
Supplement: Supplementary file 1 [file 40589831]

## Abdominopelvic Surgery: Intraoperative Ureteral Injury and Prophylaxis in the United States, 2015-2019

Steven McCarus, Ana Filipa Alexandre, Tomomi Kimura, Qi Feng, Wei Han, Emily F. Shortridge, Robson Barbosa Lima, Jason Schwartz, Steven D. Wexner

# Intraoperative Ureteral Injury During Abdominopelvic Surgeries in the US

## IUI: A serious surgical complication

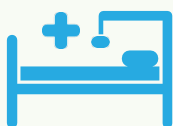

Can cause ureteral damage, sepsis, and death

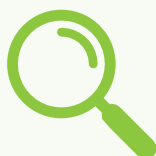

May be prevented and diagnosed via visualization of the ureters using PUC

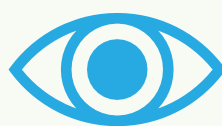

Can be identified during surgery with IDC

## From October 2015 through December 2019, IUIs occurred in

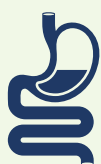

**0.88%**  
of 651,770  
gastrointestinal  
surgeries

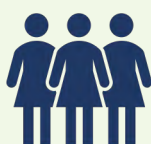

**0.29%**  
of ~1.8M  
gynecological  
surgeries

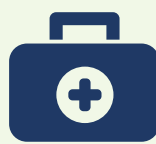

**1.17%**  
of 58,210  
other abdominopelvic  
surgeries

## Role of PUC and IDC: Multivariate analysis results

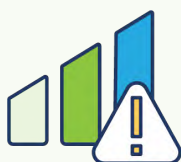

**PUC and IDC** use were associated with **higher IUI risk**

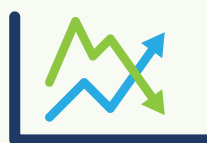

The **role** of **PUC** and **IDC** in the identification and prevention of IUI remains **unclear** due to **potential bias** with retrospective data

Abbreviations: IDC, intraoperative diagnostic cystoscopy; IUI, intraoperative ureteral injury; PUC, preoperative ureteral catheterization or stenting; US, United States

The graphical abstract represents the opinions of the authors. For a full list of declarations, including funding and author disclosure statements, and copyright information, please see the full text online.

PEER-REVIEWED  
FEATURE

 **Adis**
